53. Salas M, Hofman A, Stricker BH: Confounding by indication: An example of variation in the use of epidemiologic terminology. *Am J Epidemiol* 1999; 149:981–3
54. Bellinger DC, Jonas RA, Rappaport LA, Wypij D, Wernovsky G, Kuban KC, Barnes PD, Holmes GL, Hickey PR, Strand RD, Walsh AZ, Helmers SL, Constantinou JE, Carrazana EJ, Mayer JE, Hanley FL, Castaneda AR, Ware JH, Newburger JW: Developmental and neurologic status of children after heart surgery with hypothermic circulatory arrest or low-flow cardiopulmonary bypass. *N Engl J Med* 1995; 332: 549–55
55. Hansen TG, Pedersen JK, Henneberg SW, Morton NS, Christensen K: Neurosurgical conditions and procedures in infancy are associated with mortality and academic performances in adolescence: A nationwide cohort study. *Paediatr Anaesth* 2015; 25:186–92
56. St Sauver JL, Grossardt BR, Yawn BP, Melton LJ 3<sup>rd</sup>, Pankratz JJ, Brue SM, Rocca WA: Data resource profile: The Rochester Epidemiology Project (REP) medical records-linkage system. *Int J Epidemiol* 2012; 41:1614–24

## ANESTHESIOLOGY REFLECTIONS FROM THE WOOD LIBRARY-MUSEUM

### Mayo at Harvard? Vegetable Vapor Anesthetic by Morse on Boylston Street

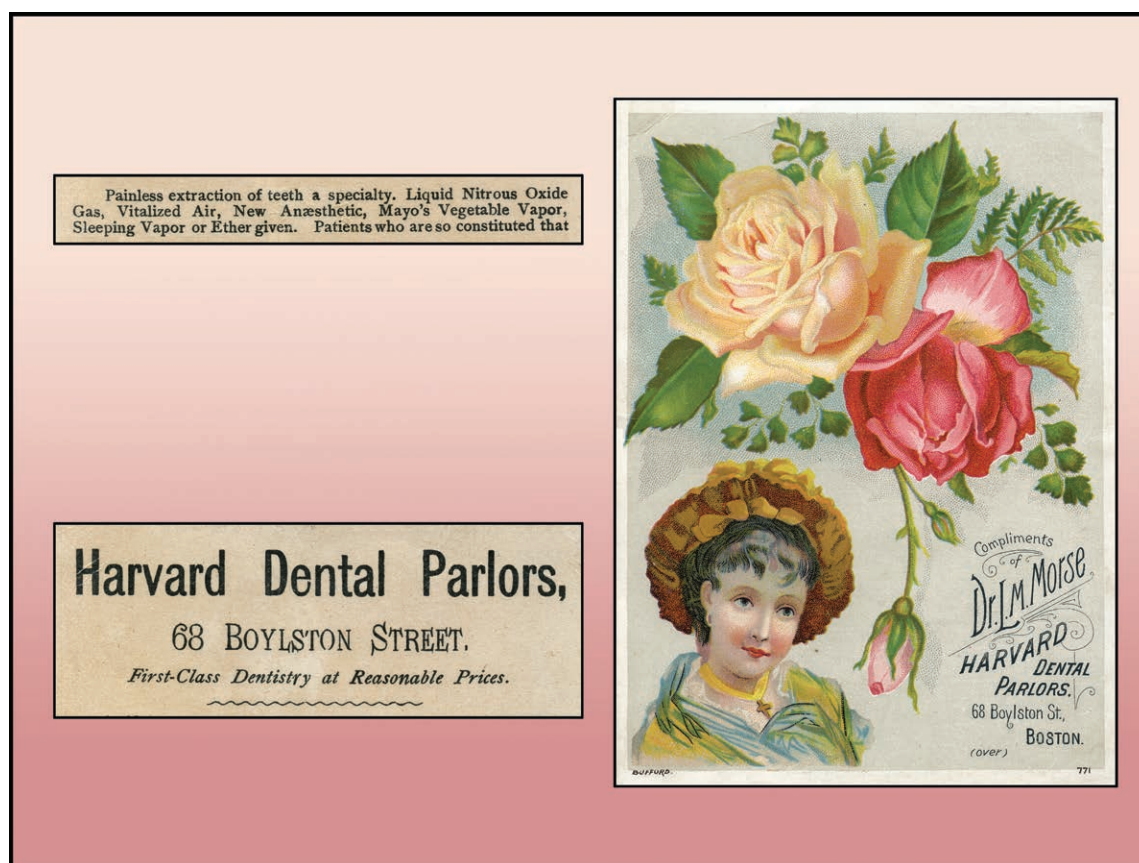

Besides ether, which has long been associated with Harvard, the proprietary Harvard Dental Parlors offered other anesthetics, including Mayo's Vegetable Vapor. As originally patented, "Mayo's Vapor" supplemented nitrous oxide with alcohol, hops, and opium to prolong the anesthetic duration of the laughing gas. Only the Boston directories for 1889 and 1890 list "Dr. L. M. Morse" (*right*) at the 68 Boylston Street address (*lower left*) on the reverse of his trade card. Refining the date further, a newspaper advertisement from April of 1890 matches exactly Morse's anesthetic offerings (*upper left*) from the trade card's reverse: "Liquid Nitrous Oxide Gas, Vitalized Air, New Anaesthetic, Mayo's Vegetable Vapor, Sleeping Vapor or Ether." (Copyright © the American Society of Anesthesiologists' Wood Library-Museum of Anesthesiology.)

George S. Bause, M.D., M.P.H., *Honorary Curator and Laureate of the History of Anesthesia*, Wood Library-Museum of Anesthesiology, Schaumburg, Illinois, and *Clinical Associate Professor*, Case Western Reserve University, Cleveland, Ohio. [UJYC@aol.com](mailto:UJYC@aol.com).
